# Supplementary material for: A refined two-step oligoribonucleotide interference-PCR method for precise discrimination of nucleotide differences
Source: PubMed Central journal article supplement (PMC6249316; doi:10.1038/s41598-018-35479-0), 2018-11-21
Supplement: 41598_2018_35479_MOESM1_ESM.pdf [file 41598_2018_35479_MOESM1_ESM.pdf]

## **Supplementary Text**

### **A refined two-step oligoribonucleotide interference-PCR method for precise discrimination of nucleotide differences**

Toshitsugu Fujita, Miyuki Yuno, Fusako Kitaura and Hodaka Fujii

## Supplementary Table and Figure Legends

### Supplementary Table S1. Primers used in this study

### Supplementary Table S2. Information on ORNs

### Supplementary Figure S1. Prediction of the T<sub>m</sub> of ORNs.

(A) Target position and nucleotide sequence of ORN\_Tax1bp1\_24b, a 24 base ORN targeting the mouse *Tax1bp1* locus. The forward DNA sequence of the allele is shown. Nucleotides additional to ORN\_Tax1bp1 are shown in red. (B) Conditions for standard Three-Step ORNi-PCR. (C) Results of Three-Step ORNi-PCR. (D) Conditions for Two-Step ORNi-PCR. (E) Results of Two-Step ORNi-PCR. (F) Predicted T<sub>m</sub> of ORNs. (1) T<sub>m</sub> calculated based on the following formula:  $(a + u) * 2 + (g + c) * 4$ . (2) T<sub>m</sub> calculated based on the following formula:  $64.9 + 41 * (g + c - 16.4) / (a + u + g + c)$ . In both formulae, a, u, g and c are the number of the A, U, G and C bases, respectively. Experiments were performed using gDNA extracted from Ba/F3 cells. M, molecular weight markers.

### Supplementary Figure S2. Amplification of the *FOS* locus is not suppressed in Three-Step ORNi-PCR.

(A) Conditions for Three-Step ORNi-PCR. (B) Results of Three-Step ORNi-PCR. gDNA extracted from 293T cells was used. M, molecular weight markers.

### Supplementary Figure S3. PCR examination of indel mutations in the *FOS* locus.

(A) Results of PCR performed in the absence of ORN\_FOS with gDNA extracted from wild-type (WT) and genome-edited 293T cells. (B) Nucleotide sequences around the TALEN\_FOS target site. Forward and reverse DNA sequences of one allele are shown. TALEN\_FOS-left and -right binding sites are underlined. Nucleotide sequences shown in (C) start from the dotted green arrow. (C) DNA sequencing of PCR products from the WT and clones F1–F14 (apart from F4 and F9) from (A) purified from agarose gels and subjected to DNA sequencing analysis using a reverse primer.

**Supplementary Figure S4. DNA sequences around the TALEN\_FOS target sites in WT and genome-edited 293T cells.**

Forward DNA sequences of both alleles are shown, and TALEN\_FOS-left and -right binding sites are underlined. The target site of ORN\_FOS is highlighted in light green. See also Supplementary Figure S3.

**Supplementary Figure S5. DNA sequencing signals from ORNi-PCR products.**

ORNi-PCR products from clones F11 and F12 in Figure 6C were purified from agarose gels and subjected to DNA sequencing analysis using a reverse primer.

**Supplementary Figure S6. Two-Step ORNi-PCR without temperature optimisation.**

(A) Conditions for Two-Step ORNi-PCR for the *FOS* locus. A lower annealing plus elongation step temperature was tested for Two-Step ORNi-PCR. (B) Results of Two-Step ORNi-PCR. M, molecular weight markers. (C) Mode of ORN-mediated suppression of target amplification for clones F11 and F12. At the optimal temperature for the annealing plus elongation step (65°C), ORN\_FOS does not hybridise with the mutated target sites in clones F11 and F12. At an annealing plus elongation step temperature of 60°C (5°C lower than the optimal temperature), ORN\_FOS hybridises with the single base insertion target site in F12, but not with the single base deletion target site in F11. (D) Mode of single-nucleotide skipping for hybridisation of gDNA/ORN\_FOS. RNA and DNA bulges can form during hybridisation.

**Supplementary Figure S7. Two-Step ORNi-PCR for the *KRAS* locus.**

(A) Conditions for Two-Step ORNi-PCR with 1 µM ORN\_KRAS\_G13. (B) Results of Two-Step ORNi-PCR. M, molecular weight markers.

**Supplementary Figure S8. Two-Step ORNi-PCR for the *KRAS* locus.**

(A) Conditions for Two-Step ORNi-PCR. A higher annealing plus elongation step temperature is used for Two-Step ORNi-PCR. (B) Results of Two-Step ORNi-PCR. M, molecular weight markers. (C) Mode of ORN-mediated suppression of target amplification for the *KRAS* locus. At an annealing plus elongation step temperature of 59°C (lower than the optimal temperature), ORN\_KRAS\_G13 hybridises with both the intact target site and the single base substitution target site. At the optimal temperature for the annealing

plus elongation step (65°C), ORN\_KRAS\_G13 hybridises with the intact target site but not the single base substitution site. At an annealing plus elongation step temperature higher than the optimal temperature (68°C), ORN\_KRAS\_G13 hybridises with neither the intact target site nor the single base substitution site. The mode for 65°C is also shown in Figure 7F.

**Supplementary Figure S9. Discrimination of a single-nucleotide difference by Two-Step ORNi-PCR with a desalted ORN.**

(A) Conditions for Two-Step ORNi-PCR with ORN\_KRAS\_G13 purified by desalting rather than HPLC. (B) Results of Two-Step ORNi-PCR. M, molecular weight markers. (C) DNA sequencing of Two-Step ORNi-PCR products from (B) purified from agarose gels and subjected to DNA sequencing analysis using a forward primer.

**Supplementary Figure S10. Two-Step ORNi-PCR using cDNA to discriminate a single-nucleotide difference in *KRAS*.**

(A) Conditions of Two-Step ORNi-PCR using cDNA from HCT116 cells and ORN\_KRAS\_G13. (B) Results of Two-Step ORNi-PCR. M, molecular weight markers. (C) DNA sequencing of Two-Step ORNi-PCR products from (B) purified from agarose gels and subjected to DNA sequencing analysis using a forward primer.

**Supplementary Figure S11. Two-Step ORNi-PCR using cDNA to discriminate splice variants.**

(A) Conditions for Two-Step ORNi-PCR using cDNA from DT40 cells and ORN\_cPax5\_Ex1B. (B) Results of Two-Step ORNi-PCR. The predicted positions of each amplicon are indicated by arrows for full-length and truncated forms. M, molecular weight markers.

**Supplementary Table S1**

| Number | Name                     | Sequence (5' → 3')          | Experiments                                                    |
|--------|--------------------------|-----------------------------|----------------------------------------------------------------|
| 28161  | mTax1bp1-exon2-F2        | ttgactgagttgtatcccatcc      | Figure 2 and Supplementary Figure S1 (Tax1bp1)                 |
| 28162  | mTax1bp1-exon2-R2        | tgcacagtgttagtatttcagtg     | Figure 2 and Supplementary Figure S1 (Tax1bp1)                 |
| 28218  | mc-myc_-0.6k-F           | ggtcgttctggaagaatgtgc       | Figure 2F (c-Myc)                                              |
| 28221  | mc-myc_-0.4k-R           | ctgcccctgcgtatatcagtcac     | Figure 2F (c-Myc)                                              |
| 27264  | hc-fos-prom-F            | aactgtcttcagttccgtacaagg    | Figures 5 and 6, and Supplementary Figures S2, S3 and S6 (FOS) |
| 27265  | hc-fos-prom-R            | gggtgagtggtagtaagaggagta    | Figures 5 and 6, and Supplementary Figures S2, S3 and S6 (FOS) |
| 28224  | hTHYN1-gRNA-target-15-F5 | ccgcagtcgagctgcagagtggtgg   | Figure 5D (THYN1)                                              |
| 28225  | hTHYN1-gRNA-target-15-R5 | caaggctgggctcaaatccacatcc   | Figure 5D (THYN1)                                              |
| 28246  | hKRAS-F3                 | tagaggtgggggtccactaggaaaact | Figure 7 and Supplementary Figures S7-9 (KRAS)                 |
| 28247  | hKRAS-R3                 | cactccaatcaaaatgcacagagagtg | Figure 7 and Supplementary Figures S7-9 (KRAS)                 |
| 28248  | hKRAS-cDNA-F             | cgggagagaggcctgctgaaaat     | Figure 10 and Supplementary Figure S10 (KRAS)                  |
| 28249  | hKRAS-cDNA-R             | ggcatcatcaacaccctgtcttgc    | Figure 10 and Supplementary Figure S10 (KRAS)                  |
| 28250  | hEGFR-Exon21-F           | gcctttccattctttggatcag      | Figures 8 and 9 (EGFR)                                         |
| 28251  | hEGFR-Exon21-R           | ctgcagggagagactgaaacct      | Figures 8 and 9 (EGFR)                                         |
| 26540  | cPax5-ex1B-F3            | gccccgatggaaatacactg        | Figure 11 and Supplementary Figure S11 (Pax5-1B)               |
| 26542  | cPax5-ex2-R2             | ggcggccattcacaaaaac         | Figure 11 and Supplementary Figure S11 (Pax5-1B)               |

Supplementary Table S2

| Name            | Sequence (5' → 3')            | Target locus             | Length (bases) | Predicted Tm (°C) <sup>(1)</sup> | Predicted Tm (°C) <sup>(2)</sup> | Practical Tm (°C) | 68°C for the elongation step | References                                              |
|-----------------|-------------------------------|--------------------------|----------------|----------------------------------|----------------------------------|-------------------|------------------------------|---------------------------------------------------------|
| ORN_Tax1bp1     | auauacggaguuaggugua           | mouse <i>Tax1bp1</i>     | 20             | 54                               | 46                               | 53–56             | Not acceptable               | This study                                              |
| ORN_Tax1bp1_24b | ggauauacggaguuagguguaau       | mouse <i>Tax1bp1</i>     | 24             | 66                               | 52                               | 62–65             | Not acceptable               | This study                                              |
| ORN_FOS         | gcgccgacgccacugcuuuu          | human <i>FOS</i>         | 20             | 66                               | 58                               | 65–68             | Not acceptable               | This study                                              |
| ORN_KRAS_G13    | guggcguaaggcaagagugc          | human <i>KRAS</i>        | 19             | 62                               | 55                               | 62–68             | Not acceptable               | This study                                              |
| ORN_EGFR_L858   | caguuuuggccagcccaaaauuc       | human <i>EGFR</i>        | 21             | 64                               | 54                               | 59–62             | Not acceptable               | This study                                              |
| ORN_cPax5_Ex1B  | cgaccgguuugcagcaauugc         | chicken <i>Pax5</i>      | 20             | 64                               | 56                               | 59–62             | Not acceptable               | This study                                              |
| ORN_302F        | ccgggggcgucgggcuugucc         | human <i>IRF-1</i>       | 21             | 78                               | 68                               | Not tested        | Acceptable                   | Plos One, 2014, 9: e113345; DNA Res., 2018, 25, 395-407 |
| ORN_306F        | ggggccggggcgucgggcuugucc      | human <i>IRF-1</i>       | 25             | 94                               | 74                               | Not tested        | Acceptable                   | Plos One, 2014, 9: e113345; DNA Res., 2018, 25, 395-407 |
| ORN-298F        | ggcgcuugggcuugucc             | human <i>IRF-1</i>       | 17             | 62                               | 59                               | Not tested        | Acceptable                   | Plos One, 2014, 9: e113345                              |
| ORN-310F        | ggcuugggcccggggcgucgggcuugucc | human <i>IRF-1</i>       | 29             | 108                              | 77                               | Not tested        | Acceptable                   | Plos One, 2014, 9: e113345                              |
| ORN-666R        | ggccgcuugcggcacagcccc         | human <i>IRF-1</i>       | 21             | 76                               | 66                               | Not tested        | Acceptable                   | Plos One, 2014, 9: e113345                              |
| ORN-363R        | caccucucggcgggcgggg           | human <i>IRF-1</i>       | 21             | 78                               | 68                               | Not tested        | Acceptable                   | Plos One, 2014, 9: e113345                              |
| ORN-181R        | caccucucggcgggcgggc           | human <i>IRF-1</i>       | 21             | 78                               | 68                               | Not tested        | Acceptable                   | Plos One, 2014, 9: e113345                              |
| ORN-MCS         | agagcggccgccaccgggug          | pBluescript (plasmid)    | 21             | 76                               | 66                               | Not tested        | Acceptable                   | Plos One, 2014, 9: e113345                              |
| ORN_20b         | cgggguucgacauugucac           | human <i>THYNI</i>       | 20             | 66                               | 58                               | Not tested        | Acceptable                   | DNA Res., 2018, 25, 395-407                             |
| ORN_24b         | uccgggguucgacauugucacgc       | human <i>THYNI</i>       | 24             | 80                               | 64                               | Not tested        | Acceptable                   | DNA Res., 2018, 25, 395-407                             |
| ORN_Target      | ccucucgggguucgacauugc         | human <i>THYNI</i>       | 23             | 76                               | 62                               | Not tested        | Acceptable                   | DNA Res., 2018, 25, 395-407                             |
| ORN_Gx5         | caccucucacccgaccccc           | human <i>CDKN2A(p16)</i> | 21             | 72                               | 62                               | 68–72             | Acceptable                   | DNA Res., 2018, 25, 395-407                             |
| ORN_p16         | gcggccgggucggguaga            | human <i>CDKN2A(p16)</i> | 20             | 72                               | 64                               | Not tested        | Acceptable                   | DNA Res., 2018, 25, 395-407                             |

(1) Tm was calculated using the formula  $(a + u) * 2 + (g + c) * 4$ , where a, u, g and c are the number of A, U, G and C bases, respectively.

(2) Tm was calculated using the formula  $64.9 + 41 * (g + c - 16.4) / (a + u + g + c)$ , where a, u, g and c are the number of A, U, G and C bases, respectively.

(2) Tm can be calculated using Oligo Calc (<http://biotools.nubic.northwestern.edu/OligoCalc.html>).

(1) (2) Temperatures below 68°C are shown in red.

**A**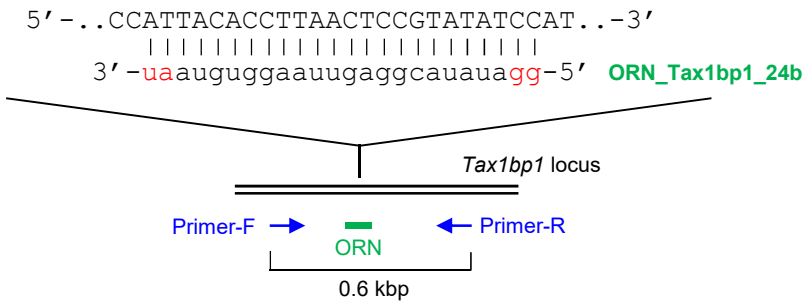**B**

gDNA: 20 ng  
ORN: 1 μM

| Temperature    | Time  | Cycle |
|----------------|-------|-------|
| 94°C           | 2 min | 1     |
| 98°C           | 10 s  | 30    |
| 59, 62 or 65°C | 30 s  |       |
| 68°C           | 50 s  |       |

**C**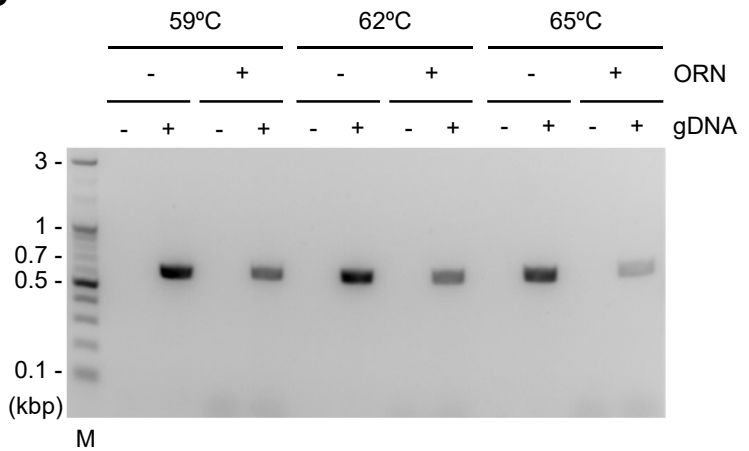**D**

gDNA: 20 ng  
ORN: 1 μM

| Temperature    | Time  | Cycle |
|----------------|-------|-------|
| 94°C           | 2 min | 1     |
| 98°C           | 10 s  | 30    |
| 59, 62 or 65°C | 80 s  |       |

**E**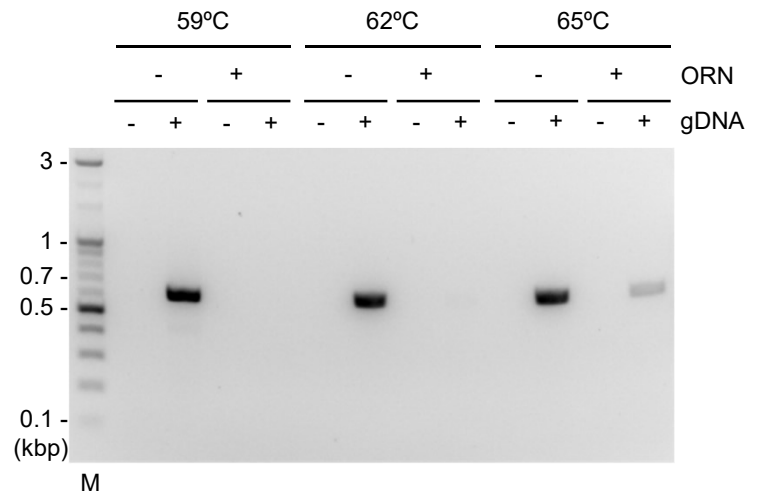**F**

| Name            | Length   | Predicted Tm <sup>(1)</sup> | Predicted Tm <sup>(2)</sup> | Practical Tm |
|-----------------|----------|-----------------------------|-----------------------------|--------------|
| ORN_Tax1bp1     | 20 bases | 54°C                        | 46°C                        | 53 – 56°C    |
| ORN_Tax1bp1_24b | 24 bases | 66°C                        | 52°C                        | 62 – 65°C    |

**Supplementary Figure S1**

**A**

gDNA: 20 ng  
ORN: 1  $\mu$ M

| Temperature        | Time  | Cycle |
|--------------------|-------|-------|
| 94°C               | 2 min | 1     |
| 98°C               | 10 s  | 30    |
| 50, 56, 62 or 68°C | 30 s  |       |
| 68°C               | 50 s  |       |

**B**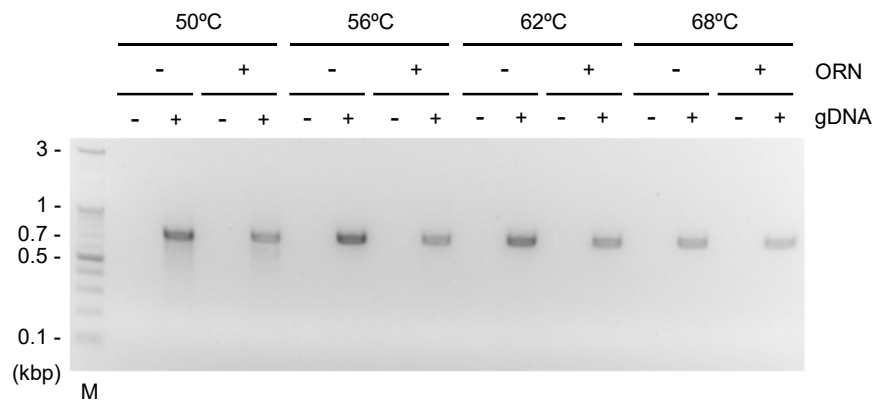**Supplementary Figure S2**



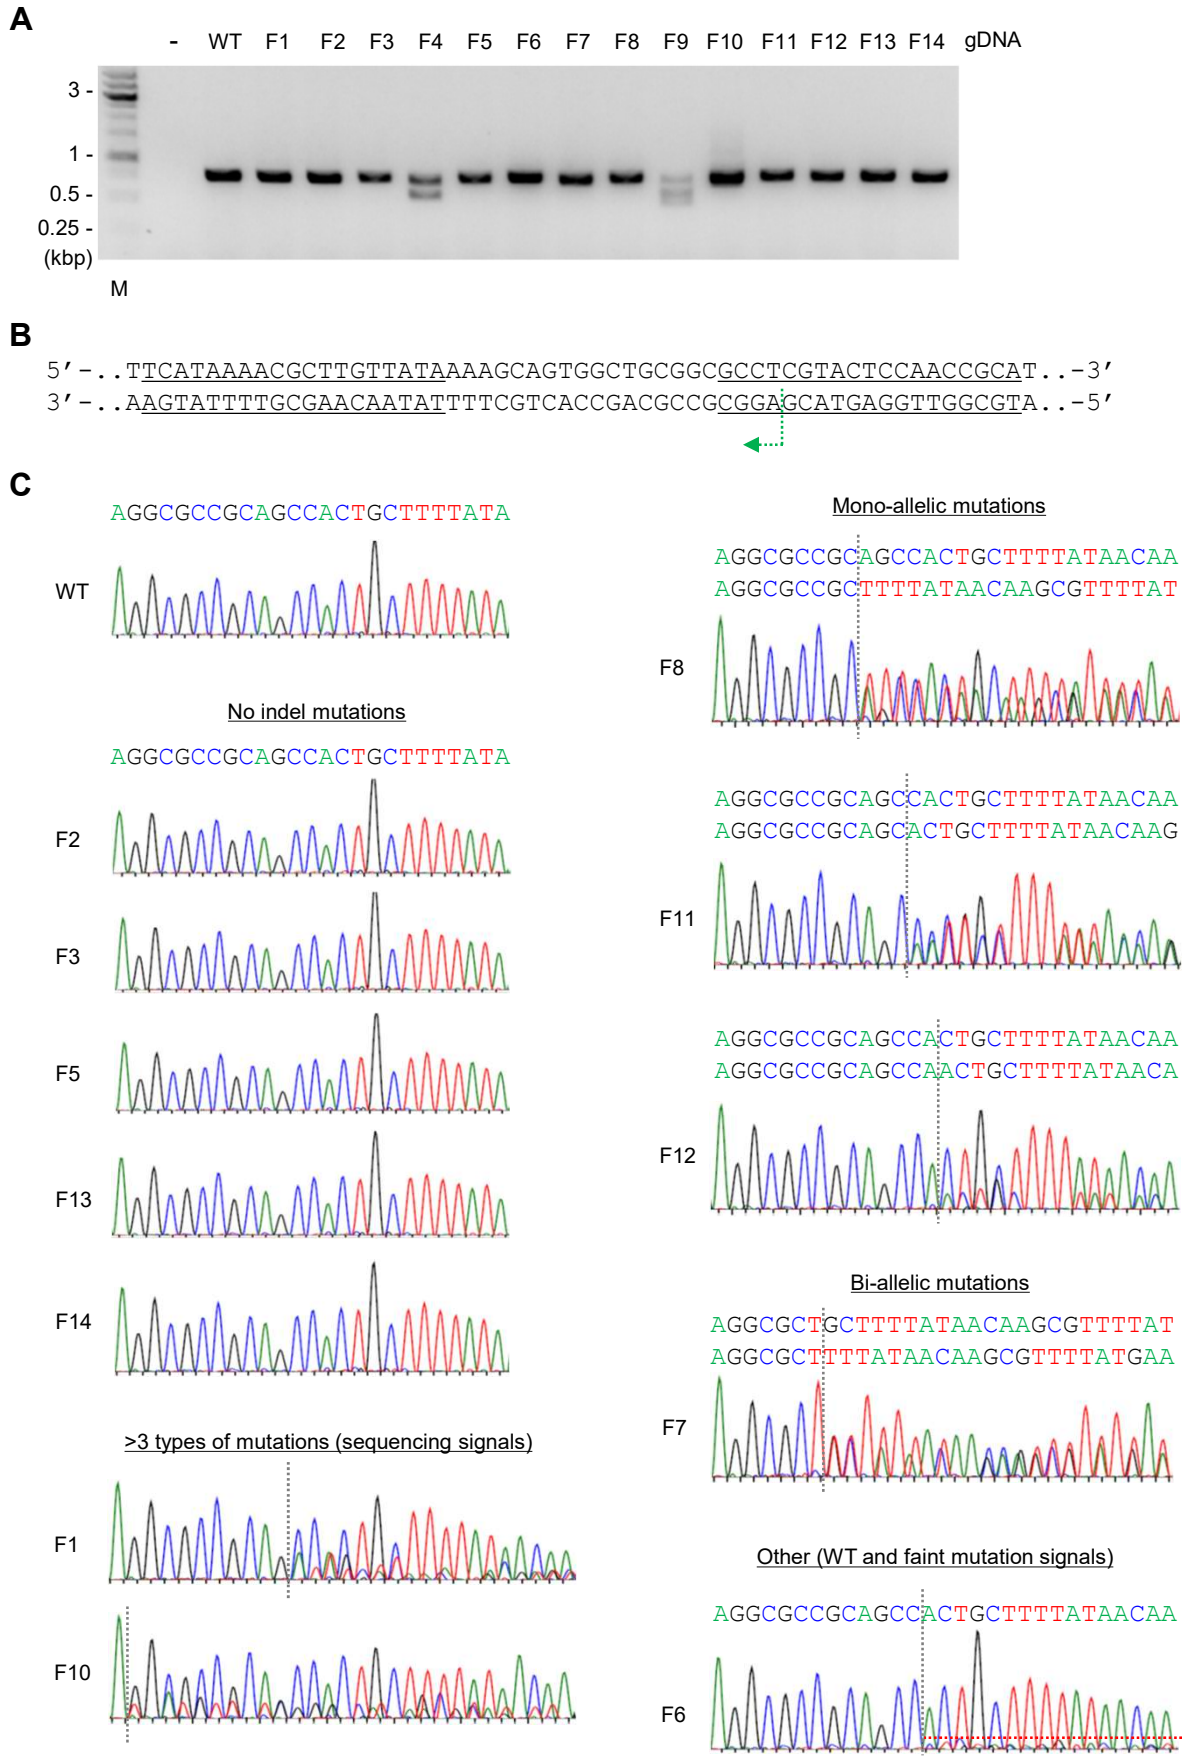

Supplementary Figure S3

WT 5' -..TTCATAAAACGCTTGTTATAAAAAGCAGTGGCTGCGGGCGCCTCGTACTCCAACCGCAT..-3'  
5' -..TTCATAAAACGCTTGTTATAAAAAGCAGTGGCTGCGGGCGCCTCGTACTCCAACCGCAT..-3'

F7 5' -..TTCATAAAACGCTTGTTATAAAAAGCA-----GCGCCTCGTACTCCAACCGCAT..-3'  
5' -..TTCATAAAACGCTTGTTATAAAA-----GCGCCTCGTACTCCAACCGCAT..-3'

F8 5' -..TTCATAAAACGCTTGTTATAAAAAGCAGTGGCTGCGGGCGCCTCGTACTCCAACCGCAT..-3'  
5' -..TTCATAAAACGCTTGTTATAAAA-----GCGGGCGCCTCGTACTCCAACCGCAT..-3'

F11 5' -..TTCATAAAACGCTTGTTATAAAAAGCAGTGGCTGCGGGCGCCTCGTACTCCAACCGCAT..-3'  
5' -..TTCATAAAACGCTTGTTATAAAAAGCAGTG-CTGCGGGCGCCTCGTACTCCAACCGCAT..-3'

F12 5' -..TTCATAAAACGCTTGTTATAAAAAGCAGTGGCTGCGGGCGCCTCGTACTCCAACCGCAT..-3'  
5' -..TTCATAAAACGCTTGTTATAAAAAGCAGTGGCTGCGGGCGCCTCGTACTCCAACCGCAT..-3'  
T

## Supplementary Figure S4

AGGCGCCGCAGCCACTGCTTTTATAACAA (WT)  
AGGCGCCGCAGCACTGCTTTTATAACAAG (1-base deletion) **detected**

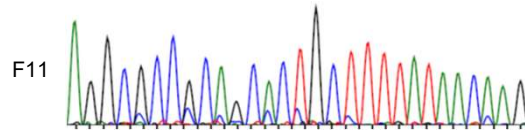

AGGCGCCGCAGCCACTGCTTTTATAACAA (WT)  
AGGCGCCGCAGCCAAC T GCTTTTATAACA (1-base insertion) **detected**

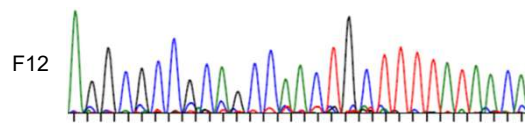

## Supplementary Figure S5



**A**

gDNA: 20 ng  
ORN: 1  $\mu$ M

| Temperature    | Time  | Cycle |
|----------------|-------|-------|
| 94°C           | 2 min | 1     |
| 98°C           | 10 s  | 30    |
| 59, 62 or 65°C | 80 s  |       |

**B**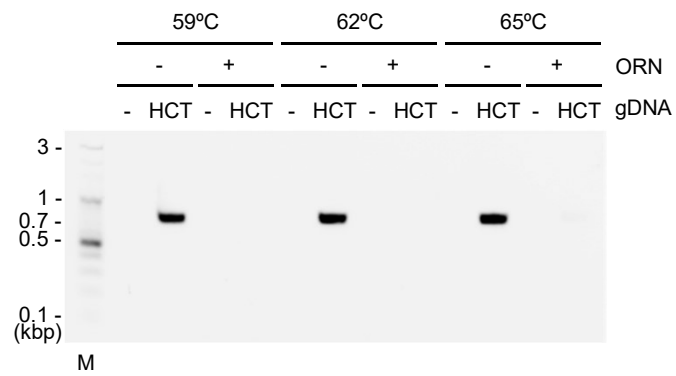**Supplementary Figure S7**

**A**

gDNA: 20 ng  
ORN: 0.5  $\mu$ M

| Temperature | Time  | Cycle |
|-------------|-------|-------|
| 94°C        | 2 min | 1     |
| 98°C        | 10 s  | 30    |
| 68°C        | 80 s  |       |

**B**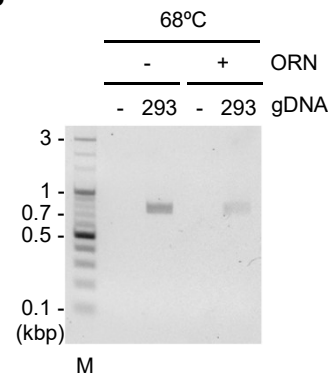**C**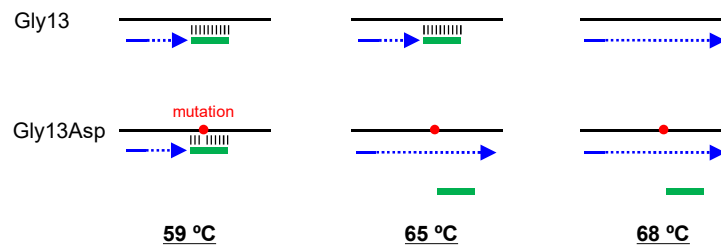**Supplementary Figure S8**

**A**

gDNA: 20 ng  
ORN (desalted): 0.5  $\mu$ M

| Temperature    | Time  | Cycle |
|----------------|-------|-------|
| 94°C           | 2 min | 1     |
| 98°C           | 10 s  | 30    |
| 59, 62 or 65°C | 80 s  |       |

**B**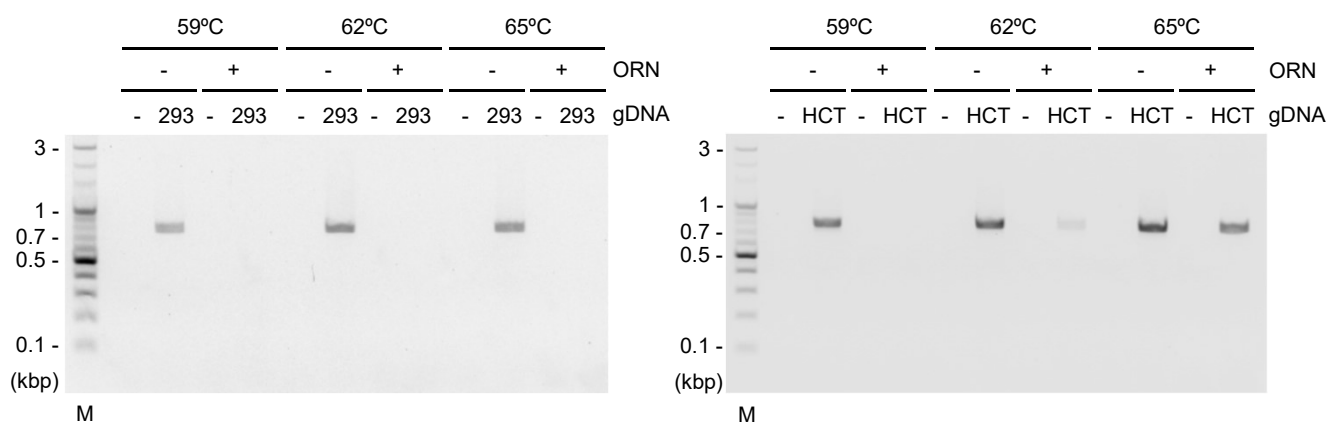**C**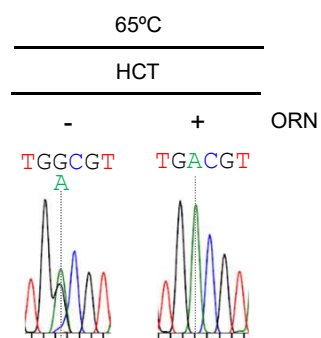**Supplementary Figure S9**

**A**ORN: 0.25 or 0.5  $\mu\text{M}$ 

| Temperature | Time  | Cycle |
|-------------|-------|-------|
| 94°C        | 2 min | 1     |
| 98°C        | 10 s  | 30    |
| 59 or 68°C  | 60 s  |       |

**B**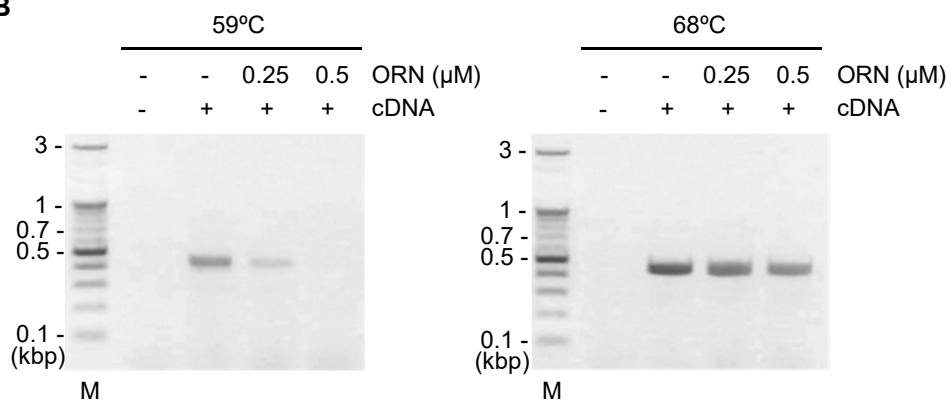**C**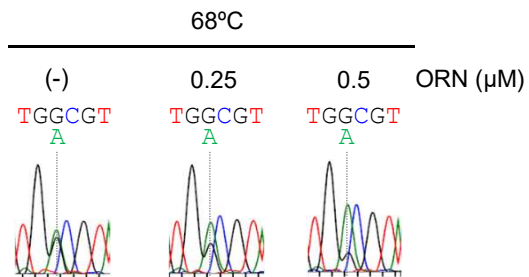**Supplementary Figure S10**



**A**

ORN: 1  $\mu$ M  
Calculated T<sub>m</sub>: 64°C

| Temperature            | Time  | Cycle |
|------------------------|-------|-------|
| 94°C                   | 2 min | 1     |
| 98°C                   | 10 s  | 35    |
| 53, 56, 59, 62 or 65°C | 35 s  |       |

**B**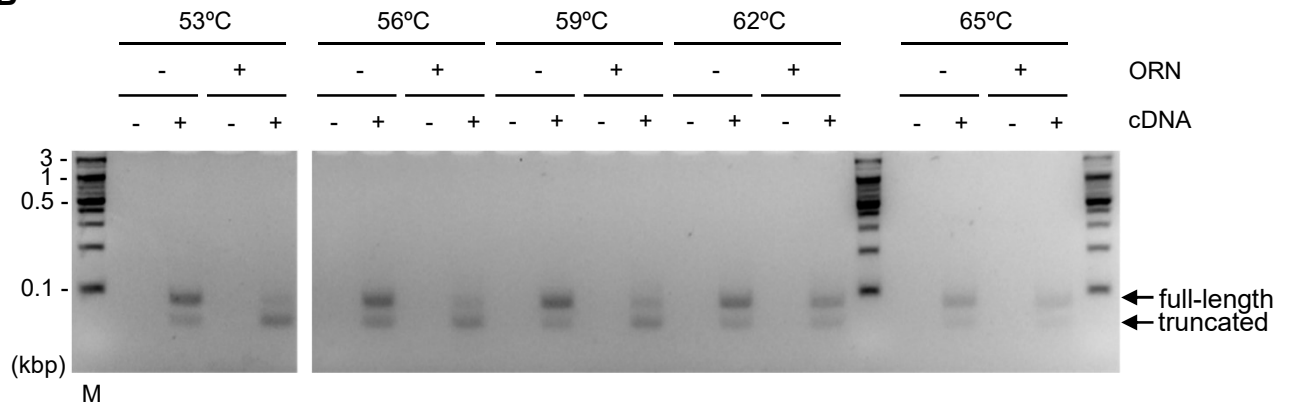

**Supplementary Figure S11**
